# Supplementary material for: The role of the Sunda shelf biogeographic barrier in the cryptic differentiation of Conus litteratus (Gastropoda: Conidae) across the Indo-Pacific region
Source: PeerJ. 2023 Jul 14;11:e15534. doi: 10.7717/peerj.15534 (PMC10351507; doi:10.7717/peerj.15534)
Supplement: Supplemental Information 3 [file peerj-11-15534-s003.xlsx]

## Sheet: Sheet1
Sl No.	SL(mm)	SW/MD (mm)	AH (mm)	HMD	RD	PMD	RSH
1	51	31	50	41	0.62	0.82	0.0196078
2	53	31	52	43	0.596154	0.826923	0.0188679
3	56	32	55	47	0.581818	0.854545	0.0178571
4	54	31	53	44	0.584906	0.830189	0.0185185
5	59	31	58	50	0.534483	0.862069	0.0169492
	Recorded shell length/Standard length (SL).
	Maximum diameter/Shell width (MD)
	Aperture height (AH)
	Height of maximum diameter (HMD)
	Relative diameter (RD = MD/AH),
	Position of maximum diameter (PMD = HMD/AH)
	Relative spire height (RSH = (SL - AH)/SL
